# Supplementary material for: Sensitivity of non-small cell lung cancer to erlotinib is regulated by the Notch/miR-223/FBXW7pathway
Source: Oxford University Press journal article supplement (doi:10.1042/bsr20160478), 2017-05-16

## **SUPPLEMENTARY MATERIAL**

### **Title: Sensitivity of non-small cell lung cancer to erlotinib is regulated by the Notch/miR-223/FBXW7 pathway**

Haiwei Zhang<sup>1,2,#</sup>, Fanglin Chen<sup>3,#</sup>, Yongpeng He<sup>1,2</sup>, Lin Yi<sup>1,2</sup>, Chuang Ge<sup>1,2</sup>, Xiaolong Shi<sup>1,2</sup>, Chao Tang<sup>1,2</sup>, Donglin Wang<sup>4</sup>, Yongzhong Wu<sup>5</sup>, Weiqi Nian<sup>1,2,\*</sup>

1 Key Laboratory of Oncology, Chongqing cancer Hospital & Institute & Cancer center, Chongqing, 400030, P.R. China.

2 Chongqing key laboratory of translational research for cancer metastasis and individualized treatment, Chongqing cancer Institute, Chongqing, 400030, P.R. China.

3 Cancer Institute of People's Liberation Army, Xinqiao Hospital, Third Military Medical University, Chongqing, 400037, P.R. China.

4 Department of Oncology, Chongqing Cancer Institute, Chongqing, 400030, P.R. China.

5 Department of Radiotherapy, Chongqing Cancer Institute, Chongqing, 400030, P.R. China.

# Authors contributed equally to this work.

\* *Corresponding to:* Professor Weiqi Nian, Key Laboratory of Oncology, Chongqing cancer Hospital & Institute & Cancer center, 181 HanYu Road, Shapingba district, Chongqing, 400030, P.R. China

E-mail: weiqinian@yeah.net

Tel: +86023-65303776

**Figure S1.** Knockdown of *IGF1R* had no effect on sensitivity to erlotinib. The *IGF1R* mRNA (A) and protein (B) levels in HCC827/ER cells transfected with *IGF1R* siRNA or empty vector lentivirus. (C) Images recorded with MicroView image viewer showing the numbers HCC827/ER cell colonies formed after transfection with *IGF1R* siRNA or empty vector lentivirus. (D) The percentage of CD44<sup>+</sup> cells in each group of HCC827 cells transfected with *IGF1R* siRNA or empty vector lentivirus. (E) Representative data from FACS analyses of cell apoptosis levels and the percentage of apoptotic cells among HCC827 cells transfected with *IGF1R* siRNA or empty vector lentivirus. All data represent the mean value  $\pm$  SD from 3 independent experiments. \*\* $p < 0.01$ .

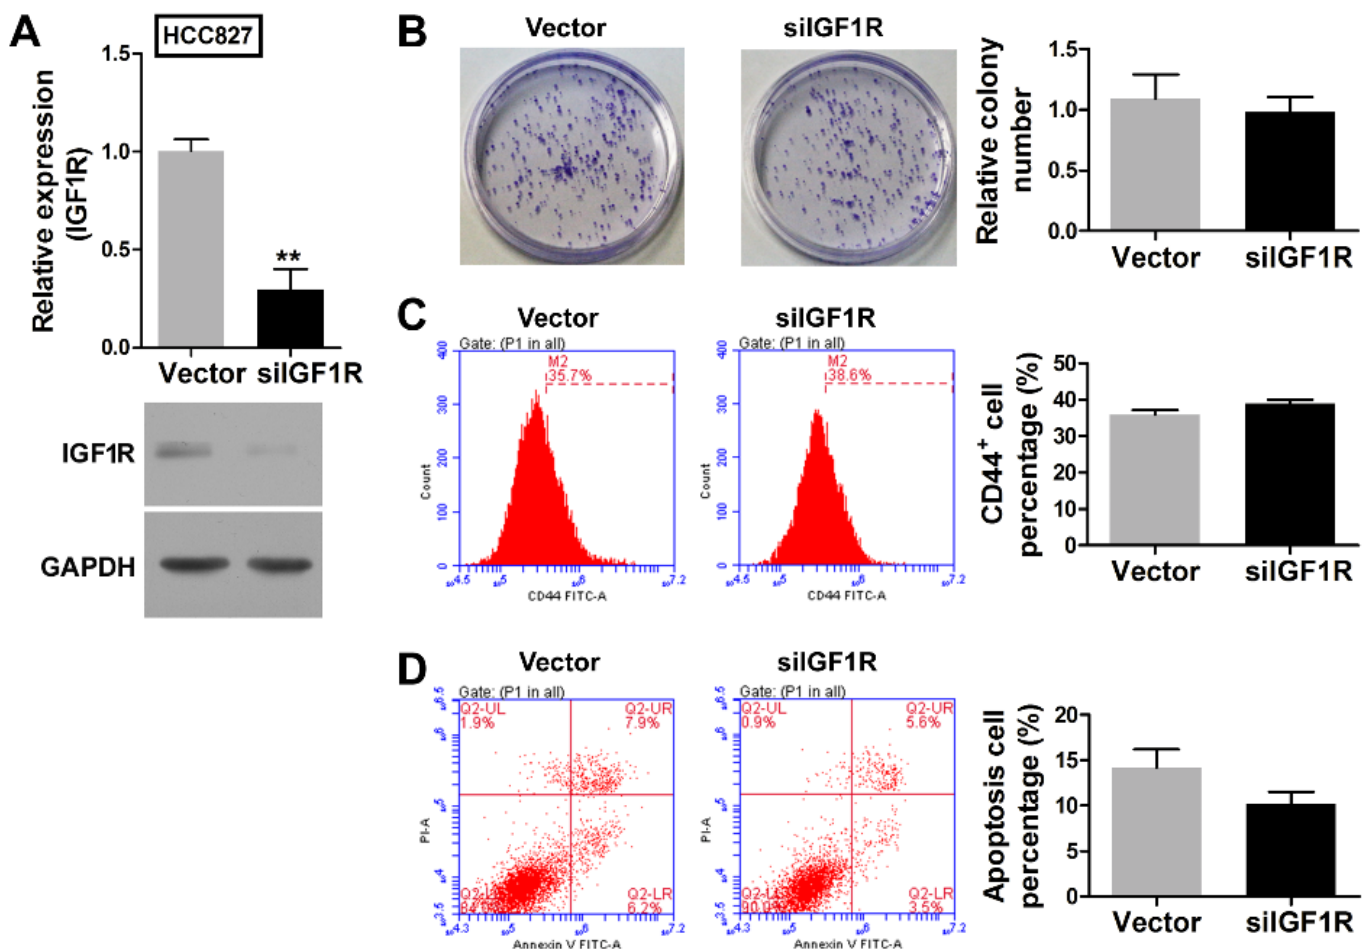

Supplement: bsr20160478_supp1.pdf [file bsr20160478_supp1.pdf]
